# Supplementary material for: Gypenoside XVII Reduces Synaptic Glutamate Release and Protects against Excitotoxic Injury in Rats
Source: MDPI journal article supplement (doi:10.3390/biom14050589), 2024-05-16

GP-17\_PKA

Actin

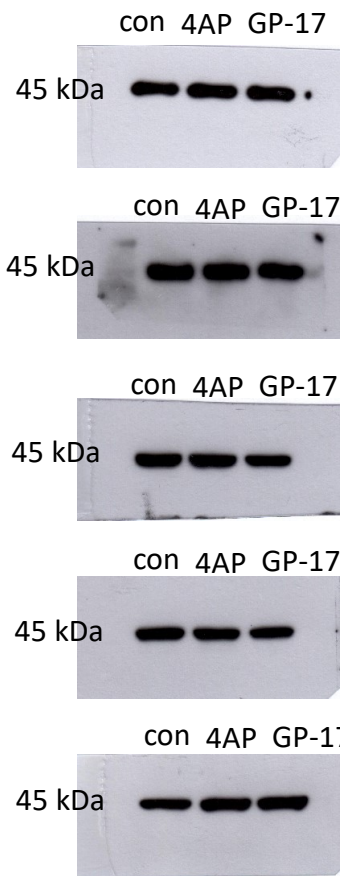

PKA

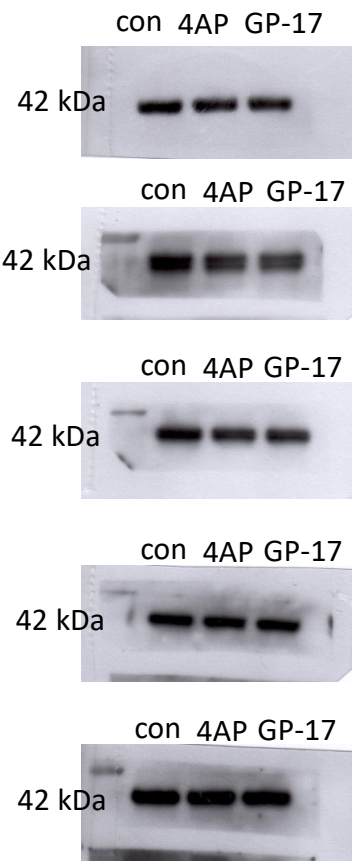

P-PKA (Thr197)

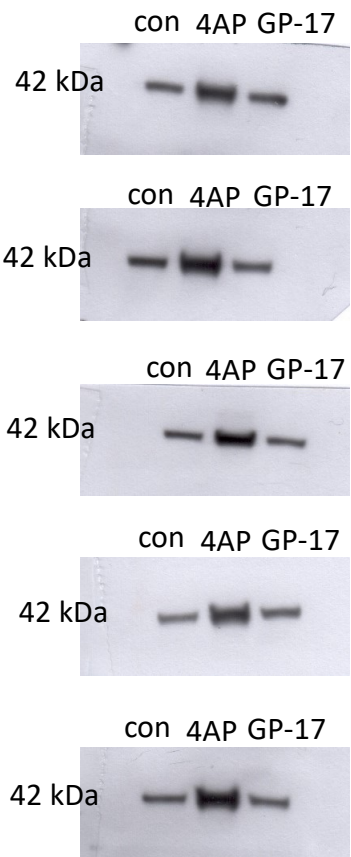

GP-17\_ Synapsin I

Actin

Synapsin I

P-Synapsin (Ser9)

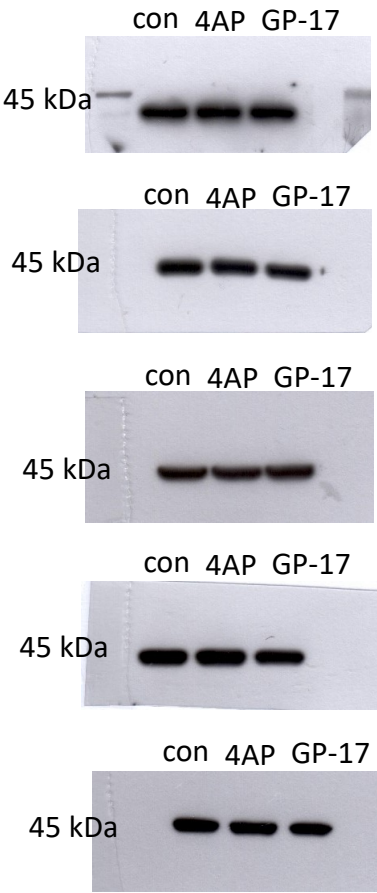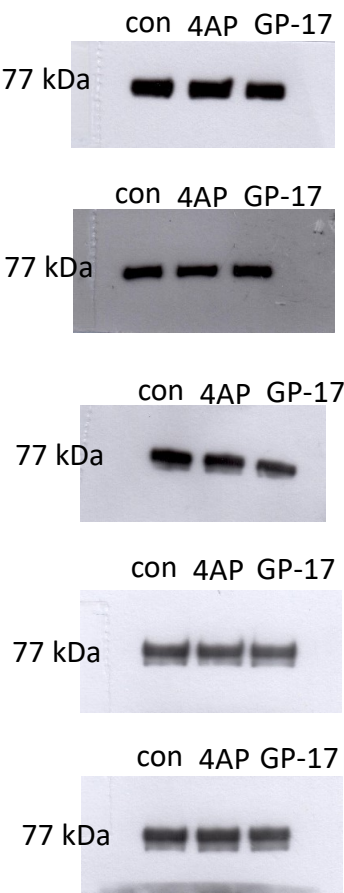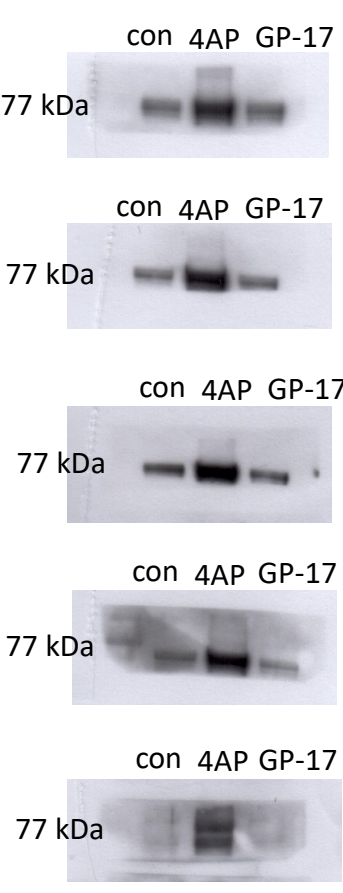

GP-17\_ SNAP25

Actin

SNAP25

P-SNAP25 (Thr138)

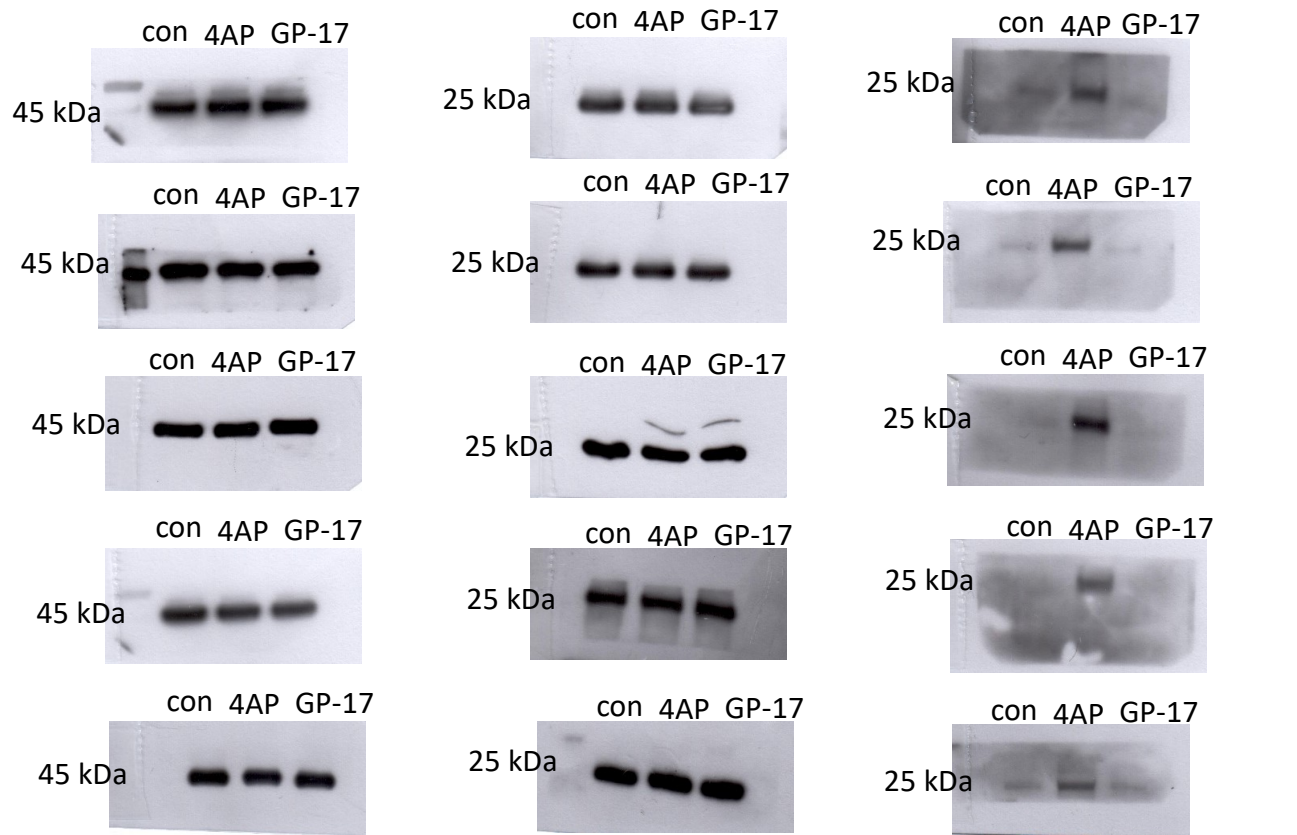

GP-17\_Neuron Glutamate transporters

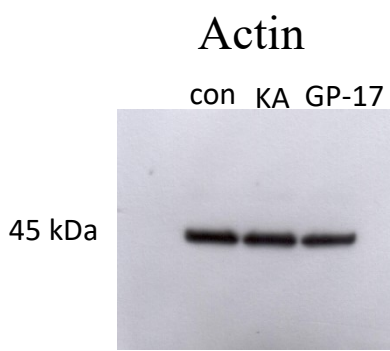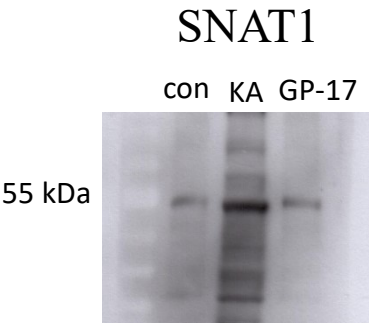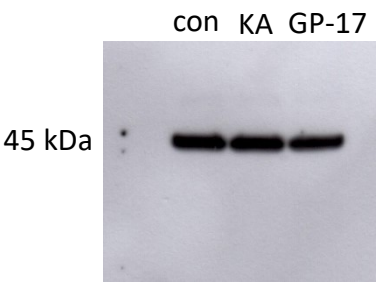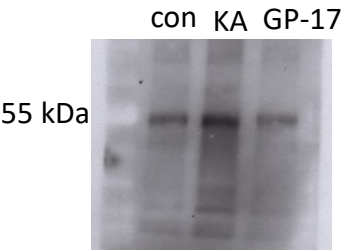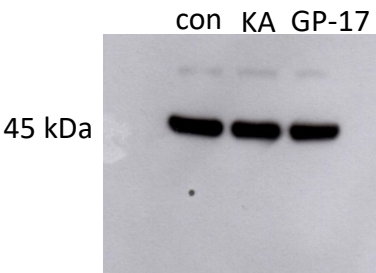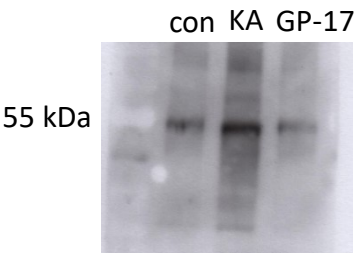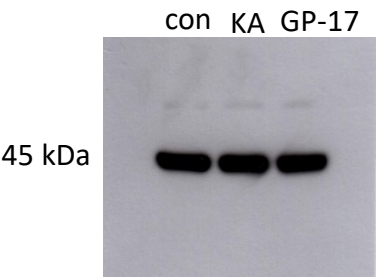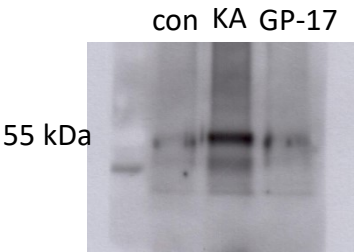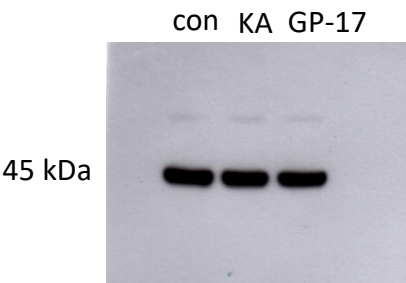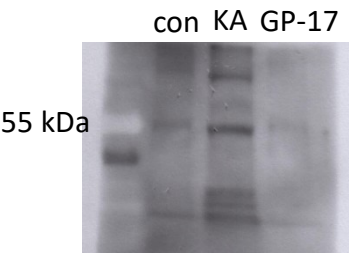

GP-17\_Neuron Glutamate transporters

Glutaminase

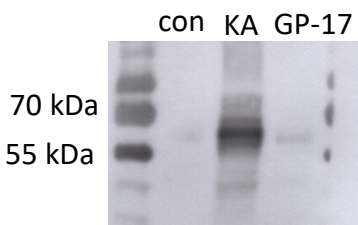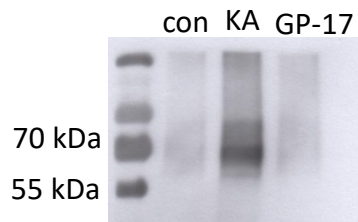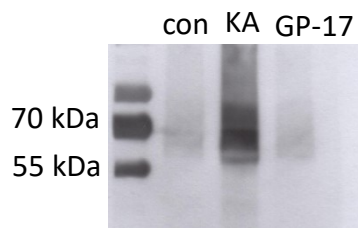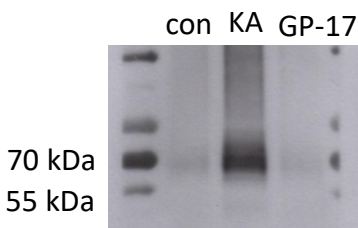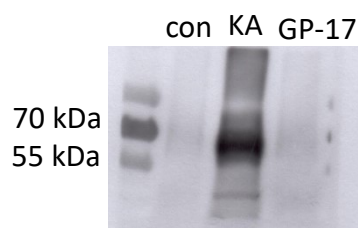

GDH

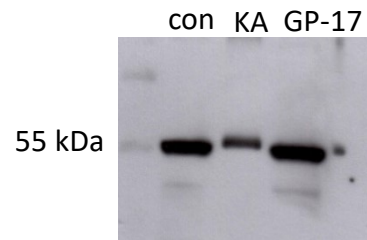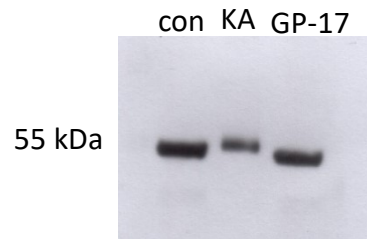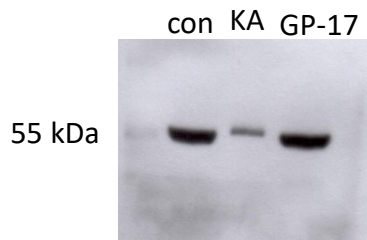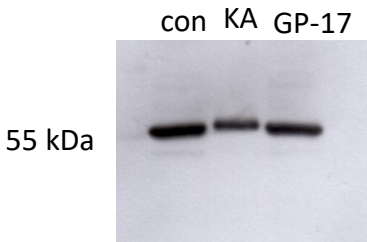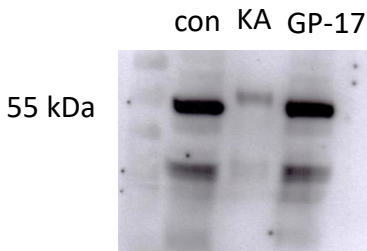

vGluT1

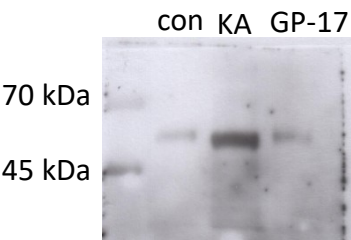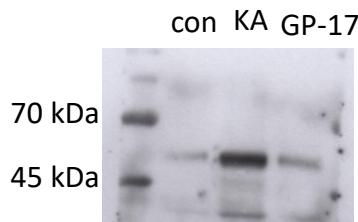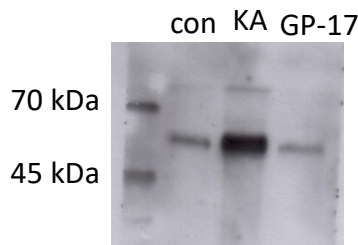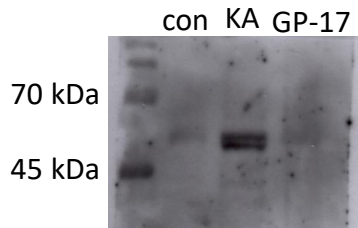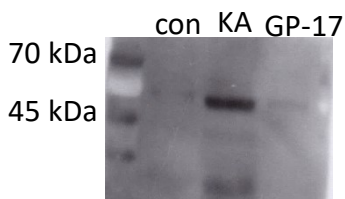

GP-17\_NMDA receptor

Actin

con KA GP-17

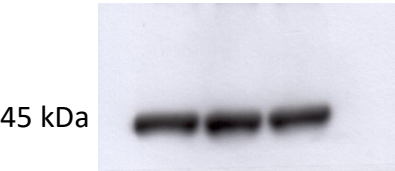

GluN2A

con KA GP-17

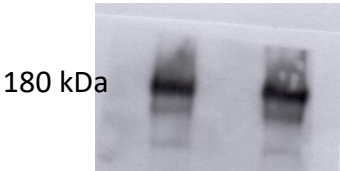

GluN2B

Con KA GP-17

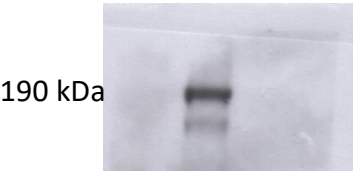

con KA GP-17

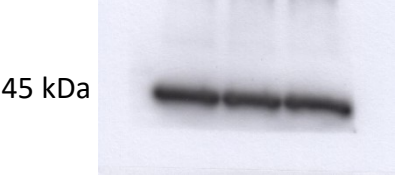

con KA GP-17

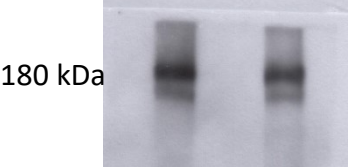

con KA GP-17

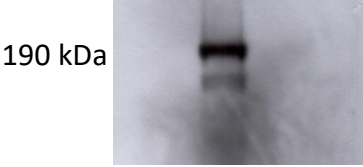

con KA GP-17

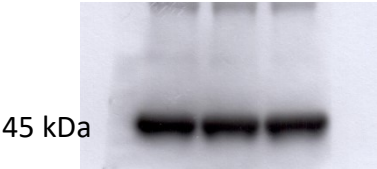

con KA GP-17

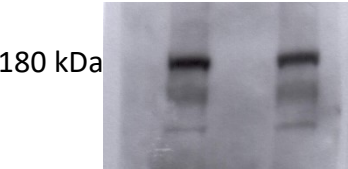

con KA GP-17

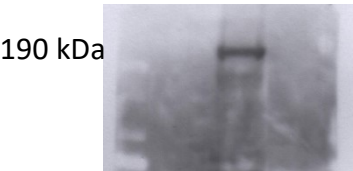

con KA GP-17

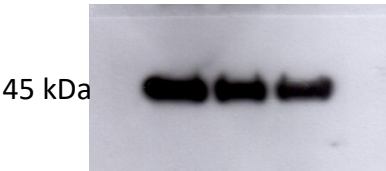

con KA GP-17

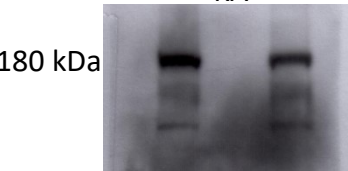

con KA GP-17

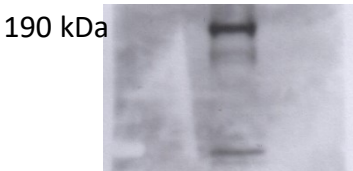

con KA GP-17

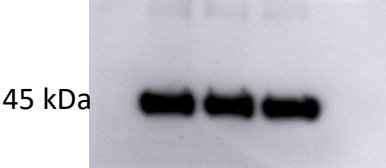

con KA GP-17

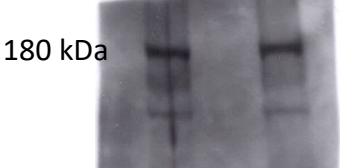

con KA GP-17

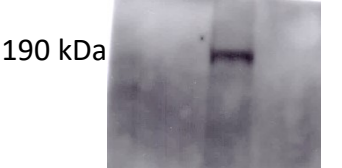



GP-17\_ArgII

Actin

con KA GP-17

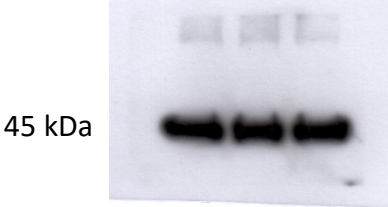

con KA GP-17

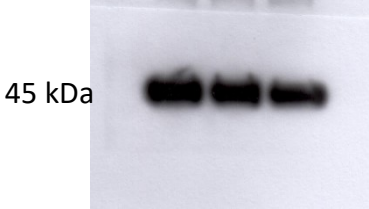

con KA GP-17

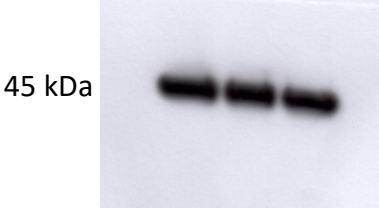

con KA GP-17

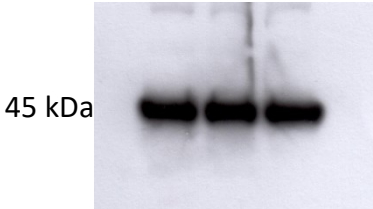

con KA GP-17

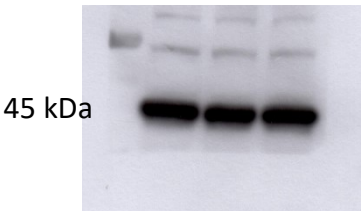

ArgII

con KA GP-17

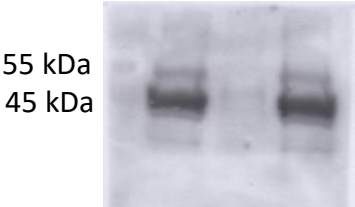

con KA GP-17

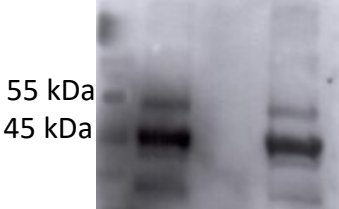

con KA GP-17

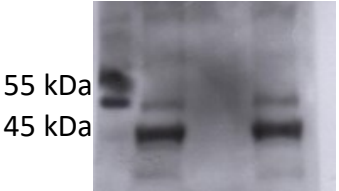

con KA GP-17

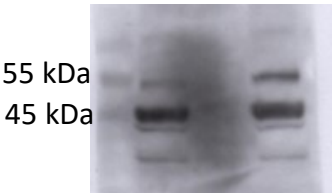

con KA GP-17

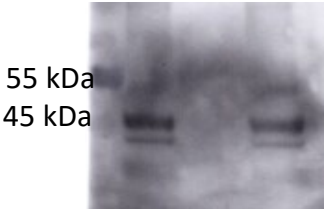

GP-17\_ GluN1

Actin

con KA GP-17

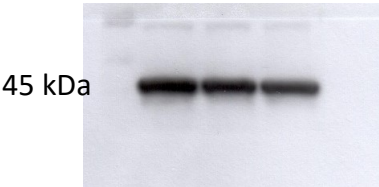

con KA GP-17

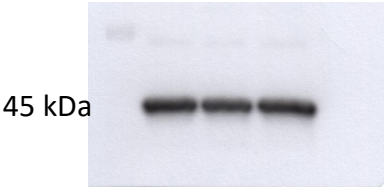

con KA GP-17

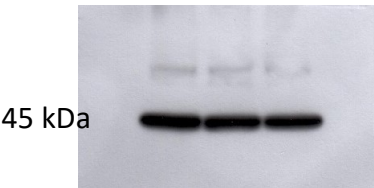

con KA GP-17

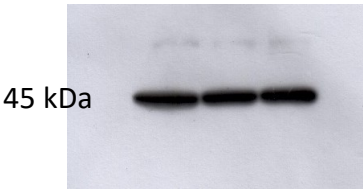

con KA GP-17

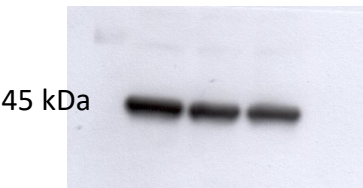

GluN1

con KA GP-17

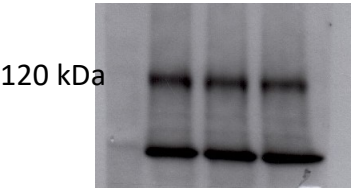

con KA GP-17

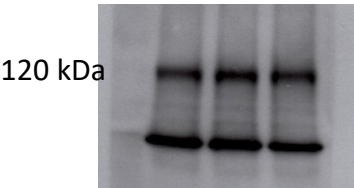

con KA GP-17

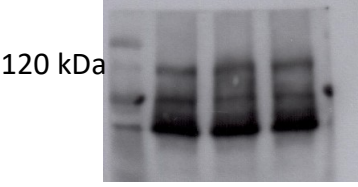

con KA GP-17

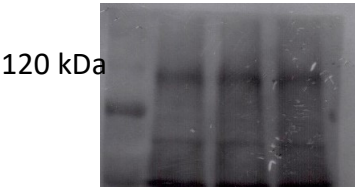

con KA GP-17

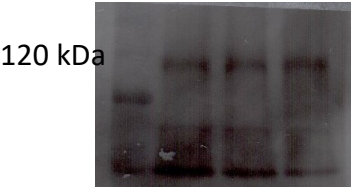

Supplement: s1 [file s1]
